# Supplementary material for: Synthesis of a 6-aryloxymethyl-5-hydroxy-2,3,4,5-tetrahydro-[1H]-2-benzazepin-4-one: a muscarinic (M3) antagonist
Source: Royal Society of Chemistry journal article supplement (doi:10.1039/b801208c), 2008-01-01
Supplement: b801208c.pdf [file b801208c.pdf]

## Supplementary data for:

---

### Synthesis of a 6-aryloxymethyl-5-hydroxy-2,3,4,5-tetrahydro-[1H]-2-benzazepin-4-one: a muscarinic (M<sub>3</sub>) antagonist

Paul Evans, Alan T. L. Lee and Eric J. Thomas\*

*The School of Chemistry, The University of Manchester, Manchester, M13 9PL, UK*

e-mail: e.j.thomas@manchester.ac.uk

---

## Experimental

### General

Low resolution mass spectra were recorded on a Micromass Trio 200 spectrometer; high resolution mass spectra were recorded on a Kratos Concept IS spectrometer. Modes of ionisation were electron impact (EI), chemical ionisation (CI) using ammonia, or electrospray in positive or negative mode (ES<sup>±</sup>). For halogenated compounds, characteristic groups of peaks due to different isotopes were observed. Infrared spectra were recorded on a Genesis FTIR spectrometer as evaporated films (from deuteriochloroform or dichloromethane) on sodium chloride plates. Nuclear magnetic resonance spectra were performed using deuterated chloroform (CDCl<sub>3</sub>) as the solvent unless otherwise stated. Proton nuclear magnetic resonance spectra (<sup>1</sup>H NMR) were recorded on a Varian INOVA Unity 500 and 300 (500 and 300 MHz) spectrometers. Residual non-deuterated solvent was used as the internal standard. Coupling constants (*J*) are quoted in Hertz (Hz). Carbon nuclear magnetic resonance spectra (<sup>13</sup>C NMR) were recorded on a Varian INOVA Unity 300 (75MHz) spectrometer.

Flash column chromatography was carried out using Merck silica gel 60H (40-60 nm, 230-300 mesh). Thin layer chromatography (TLC) was carried out using plastic plates coated with Merck HF254/366 silica gel. All reagents and solvents were purified by standard techniques and reactions in non-aqueous solvents were carried out under an atmosphere of nitrogen or argon.

### 2-Bromo-1,3-bis(bromomethyl)benzene 6<sup>5</sup>

*N*-Bromsuccinimide (106 g, 595 mmol) and azobisisobutyronitrile (*ca.* 50 mg) were added to a solution of 2-bromo-*m*-xylene **5** (50 g, 270 mmol) in carbon tetrachloride (500 cm<sup>3</sup>) and the reaction mixture was stirred under reflux for 16 h. The mixture was filtered, the precipitate washed with ether (2 x 100 cm<sup>3</sup>), and the filtrate and washings were concentrated under reduced pressure. Chromatography of the residue using light petroleum as eluent gave the tribromide **6** (49.22 g, 54 %), as a white solid, m.p. 101-103 °C (lit.,<sup>5</sup> 97-98 °C);  $\nu_{\max}$  2358, 1427, 1261, 1209, 1116, 1025, 866, 800 and 724 cm<sup>-1</sup>;  $\delta_{\text{H}}$  (300 MHz, CDCl<sub>3</sub>) 7.46 (2 H, d, *J* 7.5, ArH), 7.33 (1 H, m, ArH) and 4.69 (4 H, s, 2 x CH<sub>2</sub>); *m/z* (EI) 344 (M<sup>+</sup>, 3%), 342, (M<sup>+</sup>, 3), 265 (36), 263 (74), 261 (38), 182 (38), 184 (40) and 103 (100).

### **2-Bromo-3-(bromomethyl)-1-(2,6-dimethoxyphenoxy)methyl)benzene 7**

2,6-Dimethoxyphenol (24.61 g, 54.3 mmol) in tetrahydrofuran (100 cm<sup>3</sup>) was added dropwise to a cooled (0 °C) suspension of sodium hydride (2.61 g, 54.3 mmol, 60 % w/w dispersion in mineral oil) in tetrahydrofuran (278 cm<sup>3</sup>) and the mixture was stirred vigorously for 30 mins, before adding the bromide **6** (24.61 g, 72.4 mmol) in tetrahydrofuran (100 cm<sup>3</sup>). The reaction was stirred under reflux for 16 h then cooled (0 °C), and saturated aqueous ammonium chloride (500 cm<sup>3</sup>) was added. The mixture was extracted with ether (3 x 500 cm<sup>3</sup>) and the organic extracts were washed with brine, dried (MgSO<sub>4</sub>) and concentrated under reduced pressure. Chromatography of the residue using ether : light petroleum (0 : 100 → 50 : 50) as eluent gave the *title compound 7* (15.35 g, 51 %) as a white solid, m.p. 106-108 °C (Found: M<sup>+</sup>, 413.9459. C<sub>16</sub>H<sub>16</sub>O<sub>3</sub><sup>79</sup>Br<sub>2</sub> requires *M*, 413.9461);  $\nu_{\max}$  1596, 1494, 1478, 1435, 1296, 1256, 1218, 1111, 1046, 1027, 791, 767 and 720 cm<sup>-1</sup>;  $\delta_{\text{H}}$  (300 MHz, CDCl<sub>3</sub>) 7.81 (1 H, br. dd, *J* 7.5, 2, ArH), 7.47-7.34 (2 H, m, ArH), 7.06 (1 H, t, *J* 8.5, ArH), 6.63 (2 H, d, *J* 8.5, ArH), 5.15 and 4.71 (each 2 H, s, CH<sub>2</sub>) and 3.86 (6 H, s, 2 x OCH<sub>3</sub>);  $\delta_{\text{C}}$  (75 MHz, CDCl<sub>3</sub>) 153.96, 139.54, 137.13, 130.34, 129.76, 127.84, 124.35, 105.54, 74.40, 56.41 and 34.40; *m/z* (CI) 434 (M<sup>+</sup>+18, 100%) and 417 (22).

### **[2-Bromo-3-(2,6-dimethoxyphenoxy)methyl)phenyl]methanol 8**

The dibromide **7** (15.78 g, 38 mmol) and potassium carbonate (1.49 g, 11 mmol) were heated under reflux in dioxane:water (1 : 1, 180 cm<sup>3</sup>) for 16 h. The reaction mixture was then cooled and extracted with ethyl acetate (4 x 200 cm<sup>3</sup>). The organic extracts were washed with brine, dried (Na<sub>2</sub>SO<sub>4</sub>) and concentrated under reduced pressure to give the *title compound 8* (13.72 g, 99%), as a white solid, m.p. 101-102 °C (Found: M<sup>+</sup>+H, 353.0380. C<sub>16</sub>H<sub>18</sub>O<sub>4</sub><sup>79</sup>Br requires *M*, 353.0383);  $\nu_{\max}$  3401, 1597, 1495, 1478, 1297, 1256, 1217, 1111, 1022, 777 and 765 cm<sup>-1</sup>;  $\delta_{\text{H}}$  (300 MHz, CDCl<sub>3</sub>) 7.78 (1 H, br. dd, *J* 7.5, 2, ArH), 7.48-7.35 (2 H, m, ArH), 7.05 (1 H, t, *J* 8.5, ArH), 6.63 (2 H, d, *J* 8.5, ArH), 5.15 and 4.79 (each 2 H, s, CH<sub>2</sub>), 3.85 (6 H, s, 2 x CH<sub>3</sub>) and 2.31 (1 H, br. s, OH);  $\delta_{\text{C}}$  (75 MHz, CDCl<sub>3</sub>) 153.99, 139.98,

138.42, 137.20, 128.90, 127.99, 127.65, 124.30, 122.60, 105.60, 74.36, 65.63 and 56.41;  $m/z$  (CI) 372 ( $M^+ + 18$ , 90%), 370 ( $M^+ + 18$ , 100), 353 (34) and 355 (32).

### **2-[2-(2,6-Dimethoxyphenoxy)methyl]-6-(hydroxymethyl)phenyl]propan-2-ol 9**

*n*-Butyllithium (1.6 M in hexanes, 19.0 cm<sup>3</sup>, 31 mmol) was added dropwise to a cooled (-78 °C) solution of the bromide **8** (5.0 g, 14 mmol) in tetrahydrofuran (50 cm<sup>3</sup>) and the mixture was stirred for 45 mins before acetone (5.19 cm<sup>3</sup>, 71 mmol) was added dropwise. After a further 2 h at -78 °C, saturated methanolic ammonium chloride (20 cm<sup>3</sup>) and water (50 cm<sup>3</sup>) were added. The mixture was extracted with ethyl acetate (4 x 50 cm<sup>3</sup>) and the organic extracts were washed with brine, dried (Na<sub>2</sub>SO<sub>4</sub>) and concentrated under reduced pressure. Chromatography of the residue using ethyl acetate : light petroleum (1 : 3) as eluent gave the *title compound 9* (3.51 g, 75%), as a white solid, m.p. 99-101 °C (Found:  $M^+ + NH_4$ , 350.1963. C<sub>19</sub>H<sub>28</sub>NO<sub>5</sub> requires  $M$ , 350.1962)  $\nu_{max}$  3451, 1597, 1494, 1478, 1296, 1255, 1112, 1031, 961, 771 and 732 cm<sup>-1</sup>;  $\delta_H$  (300 MHz, CDCl<sub>3</sub>) 7.56 and 7.36 (each 1 H, dd,  $J$  7.5, 1.5, ArH), 7.24 (1 H, t,  $J$  7.5, ArH), 7.05 (1 H, t,  $J$  8.5, ArH), 6.57 (2 H, d,  $J$  8.5, ArH), 5.26 and 4.86 (each 2 H, s, CH<sub>2</sub>), 3.88 (6 H, s, 2 x OCH<sub>3</sub>) and 1.93 (6 H, s, 2 x CH<sub>3</sub>);  $\delta_C$  (75 MHz, CDCl<sub>3</sub>) 153.94, 146.92, 138.24, 136.72, 135.20, 133.77, 132.70, 126.83, 124.32, 105.44, 75.76, 75.10, 66.40, 56.27 and 33.29;  $m/z$  (CI) 332 (5%), 315 (3), 297 (21) and 154 (100).

### **2-[2-(*tert*-Butyldimethylsilyloxymethyl)-6-(2,6-dimethoxyphenoxy)methyl]phenyl]propan-2-ol 10**

*tert*-Butyldimethylsilyl chloride (2.33 g, 15.5 mmol) was added to a cooled (0 °C) solution of the diol **9** (3.44 g, 10.4 mmol) and imidazole (1.76 g, 25.9 mmol) in anhydrous dichloromethane (43.3 cm<sup>3</sup>) and the mixture stirred for 2 h at room temperature. Water (50 cm<sup>3</sup>) was added and the mixture was extracted with dichloromethane (3 x 50 cm<sup>3</sup>). The organic extracts were washed with brine, dried (Na<sub>2</sub>SO<sub>4</sub>) and concentrated under reduced pressure. Chromatography of the residue using ethyl acetate : light petroleum (1 : 3) as eluent gave the *title compound 10* (4.58 g, 99%) as a colourless oil (Found:  $M^+ + Na$ , 469.2382. C<sub>25</sub>H<sub>38</sub>O<sub>5</sub>SiNa requires  $M$ , 469.2381);  $\nu_{max}$  3503, 1597, 1494, 1478, 1255, 1113, 838 and 775 cm<sup>-1</sup>;  $\delta_H$  (300 MHz, CDCl<sub>3</sub>) 7.62 and 7.33 (each 1 H, dd,  $J$  7.5, 2, ArH), 7.23 (1 H, t,  $J$  7.5, ArH), 7.05 (1 H, t,  $J$  8.5, ArH), 6.63 (2 H, d,  $J$  8.5, ArH), 5.47 (1 H, s, OH), 5.27 and 5.00 (each 2 H, s, CH<sub>2</sub>), 3.89 (6 H, s, 2 x OCH<sub>3</sub>), 1.81 (6 H, s, 2 x CH<sub>3</sub>), 0.96 [9 H, s, OSi(CH<sub>3</sub>)<sub>3</sub>] and 0.15 [6 H, s, OSi(CH<sub>3</sub>)<sub>2</sub>];  $\delta_C$  (75 MHz, CDCl<sub>3</sub>) 154.04, 147.03, 137.39, 136.90, 135.33, 133.55, 131.81, 126.44, 124.22, 105.43, 75.37, 74.84, 67.31, 56.28, 32.95, 26.17, 18.51 and -4.80;  $m/z$  (ES) 469 ( $M^+ + 23$ , 100%).

### **2-[2-(*tert*-Butyldimethylsilyloxymethyl)-6-(2,6-dimethoxyphenoxy)methyl]phenyl]propene 11**

Methane sulfonyl chloride (3.89 cm<sup>3</sup>, 50.3 mmol) was added dropwise to a cooled (0 °C) solution of the alcohol **10** (4.48 g, 10.1 mmol), triethylamine (14.00 cm<sup>3</sup>, 100.5 mmol) and 4-dimethylaminopyridine (45.1 mg, 0.4 mmol) in dichloromethane (50.5 cm<sup>3</sup>) and the mixture was stirred for 16 h at room temperature. Water (50 cm<sup>3</sup>) added and the mixture extracted with dichloromethane (3 x 50 cm<sup>3</sup>). The organic extracts were washed with brine, dried (MgSO<sub>4</sub>) and concentrated under reduced pressure. Chromatography of the residue using ethyl acetate : light petroleum (1 : 10 → 1 : 3) as eluent gave the *title compound* **11** (2.82 g, 66%) as a colourless oil (Found: M<sup>+</sup>, 428.2378. C<sub>25</sub>H<sub>36</sub>O<sub>4</sub>Si requires M, 428.2377);  $\nu_{\max}$  1596, 1493, 1478, 1254, 1114, 838 and 774 cm<sup>-1</sup>;  $\delta_{\text{H}}$  (300 MHz, CDCl<sub>3</sub>) 7.67 and 7.53 (each 1 H, d, *J* 7.5, ArH), 7.36 (1 H, t, *J* 7.5, ArH), 7.04 (1 H, t, *J* 8.5, ArH), 6.62 (2 H, d, *J* 8, ArH), 5.30 (1 H, m, 1-H), 4.96 and 4.94 (each 1 H, d, *J* 11, ArHCH), 4.82 (1 H, m, 1-H'), 4.78 and 4.71 (each 1 H, d, *J* 13.5, ArHCH), 3.85 (6 H, s, 2 x OCH<sub>3</sub>), 2.09 (3 H, s, 2-CH<sub>3</sub>), 0.99 [9 H, s, OSiC(CH<sub>3</sub>)<sub>3</sub>] and 0.15 and 0.14 (each 3 H, s, SiCH<sub>3</sub>);  $\delta_{\text{C}}$  (75 MHz, CDCl<sub>3</sub>) 154.23, 142.80, 140.61, 137.71, 137.58, 134.68, 128.03, 127.11, 126.20, 123.97, 116.13, 105.66, 72.36, 62.91, 56.34, 26.28, 25.00, 18.71 and -4.99; *m/z* (CI) 446 (M<sup>+</sup>+18, 24%), 429 (1), 297 (34) and 143 (100).

### **2-[6-(2,6-Dimethoxyphenoxyethyl)-2-(hydroxymethyl)phenyl]propene 12**

Tetra-*n*-butylammonium fluoride (1 M in tetrahydrofuran, 9.22 cm<sup>3</sup>, 9.22 mmol) was added dropwise to the silyl ether **11** (3.29 g, 7.68 mmol) in tetrahydrofuran (76.8 cm<sup>3</sup>) and the mixture stirred for 1 h at room temperature. After concentration under reduced pressure, chromatography of the residue using ether : light petroleum (1 : 4) gave the *title compound* **12** (2.08 g, 86%) as a pale oil (Found: M<sup>+</sup>+H, 315.1593. C<sub>19</sub>H<sub>23</sub>O<sub>4</sub> requires M, 315.1591);  $\nu_{\max}$  3409, 1640, 1596, 1493, 1478, 1296, 1254, 1112, 902 and 773 cm<sup>-1</sup>;  $\delta_{\text{H}}$  (300 MHz, CDCl<sub>3</sub>) 7.74 (1 H, dd, *J* 7.5, 1, ArH), 7.46-7.32 (2 H, m, ArH), 7.05 (1 H, t, *J* 8, ArH), 6.63 (2 H, d, *J* 8.5, ArH), 5.36 (1 H, m, 1-H), 5.07 and 4.95 (each 1 H, d, *J* 11, ArHCH), 4.88 (1 H, m, 1-H'), 4.72 and 4.65 (each 1 H, d, *J* 12.5, ArHCH), 3.85 (6 H, s, 2 x OCH<sub>3</sub>), 2.13 (3 H, s, 2-CH<sub>3</sub>) and 1.91 (1 H, br. s, OH);  $\delta_{\text{C}}$  (75 MHz, CDCl<sub>3</sub>) 154.18, 143.46, 141.76, 137.49, 135.35, 128.94, 128.63, 127.64, 127.49, 124.08, 116.56, 105.64, 72.30, 63.54, 56.38 and 25.52; *m/z* (CI) 332 (M<sup>+</sup>+18, 39%), 315 (5), 297 (12), 178 (62), 172 (64), 161 (99) and 143 (100).

### **3-(2,6-Dimethoxyphenoxyethyl)-2-propen-2-ylbenzaldehyde 13**

Dimethyl sulfoxide (1.41 cm<sup>3</sup>, 19.9 mmol) in dichloromethane (2 cm<sup>3</sup>) was added dropwise to a cooled (-78 °C) solution of oxalyl chloride (0.87 cm<sup>3</sup>, 9.96 mmol) in dichloromethane (13 cm<sup>3</sup>) and the mixture stirred for 30 mins before adding the alcohol **12** (2.08 g, 6.64 mmol) in dichloromethane (10 cm<sup>3</sup>). The reaction was stirred for a further 30 mins then triethylamine (5.55 cm<sup>3</sup>, 39.8 mmol) was added dropwise and the mixture was allowed to warm to 0 °C and stirred for 30 mins. Saturated aqueous ammonium

chloride (50 cm<sup>3</sup>) was added and the mixture was extracted with dichloromethane (3 x 50 cm<sup>3</sup>). The organic extracts were washed with brine, dried (Na<sub>2</sub>SO<sub>4</sub>) and concentrated under reduced pressure. Chromatography of the residue using ether : light petroleum (1 : 3) as eluent gave the *title compound 13* (1.80 g, 87%) as a pale yellow oil (Found: M<sup>+</sup>+H, 313.1441. C<sub>19</sub>H<sub>21</sub>O<sub>4</sub> requires *M*, 313.1434);  $\nu_{\max}$  1691, 1596, 1494, 1478, 1297, 1254, 1216, 1113 and 774 cm<sup>-1</sup>;  $\delta_{\text{H}}$  (300 MHz, CDCl<sub>3</sub>) 10.25 (1 H, s, CHO), 8.06 and 7.93 (each 1 H, dd, *J* 7.5, 1, ArH), 7.48 (1 H, t, *J* 8, ArH), 7.06 (1 H, t, *J* 8.5, ArH), 6.62 (2 H, d, *J* 8.5, ArH), 5.51 (1 H, pent, *J* 1.5, 1'-H), 5.12 and 4.99 (each 1 H, d, *J* 11.5, ArHCH), 4.99 (1 H, q, *J* 1, 1'-H'), 3.85 (6 H, s, 2 x OCH<sub>3</sub>) and 2.20 (3 H, t, *J* 1, 2'-CH<sub>3</sub>);  $\delta_{\text{C}}$  (75 MHz, CDCl<sub>3</sub>) 192.89, 154.07, 146.78, 140.65, 137.04, 136.39, 135.43, 132.91, 127.61, 127.15, 124.33, 118.91, 105.47, 71.41, 56.26 and 26.74; *m/z* (CI) 332 (35%), 313 (85) and 295 (100).

#### ***N*-[3-(2,6-Dimethoxyphenoxyethyl)-2-(propen-2-yl)phenylmethyl]prop-2-enylamine 14**

Prop-2-enylamine (0.80 cm<sup>3</sup>, 10.7 mmol), was added to magnesium sulfate (9.19 g) and the aldehyde **13** (1.67 g, 5.34 mmol) in dichloromethane (55 cm<sup>3</sup>), and the mixture stirred for 18 h at room temperature then filtered and concentrated under reduced pressure. The residue was dissolved in anhydrous methanol (36 cm<sup>3</sup>), the solution was cooled to 0 °C, and sodium borohydride (304.5 mg, 8.01 mmol) was added. The suspension was stirred for 2 h at 0 °C and for a further 1 h at room temperature, then concentrated under reduced pressure and dichloromethane (50 cm<sup>3</sup>) and water (50 cm<sup>3</sup>) were added. Aqueous sodium hydroxide (2 M) was added until the pH was *ca.* 10 and the aqueous phase was extracted with dichloromethane (3 x 50 cm<sup>3</sup>). The organic extracts were washed with brine, dried (MgSO<sub>4</sub>) and concentrated under reduced pressure. Chromatography of the residue using ether : light petroleum (6 : 4 → 100 : 0) as eluent gave the *title compound 14* (1.69 g, 90%) as a pale yellow oil (Found: M<sup>+</sup>+H, 354.2062. C<sub>22</sub>H<sub>28</sub>NO<sub>3</sub> requires *M*, 354.2064);  $\nu_{\max}$  3073, 1641, 1596, 1494, 1478, 1296, 1254, 1218, 1113 and 773 cm<sup>-1</sup>;  $\delta_{\text{H}}$  (300 MHz, CDCl<sub>3</sub>) 7.68 and 7.38 (each 1 H, dd, *J* 7.5, 1.5, ArH), 7.32 (1 H, t, *J* 7.5, ArH), 7.03 (1 H, t, *J* 8.5, ArH), 6.61 (2 H, d, *J* 8.5, ArH), 5.97 (1 H, ddt, *J* 17, 10, 6, 2-H), 5.33 (1 H, m, 2''-H), 5.22 (1 H, dq, *J* 17, 1.5, 3-H), 5.13 (1 H, dq, *J* 10, 1.7, 3-H'), 5.05 and 4.93 (each 1 H, d, *J* 11, ArHCHO), 4.85 (1 H, m, 2''-H'), 3.85 (6 H, s, 2 x OCH<sub>3</sub>), 3.83 and 3.75 (each 1 H, d, *J* 13, ArHCHN), 3.29 (2 H, dt, *J* 6, 1.5, 1-H<sub>2</sub>), 2.11 (3 H, t, *J* 1.5, 1''-CH<sub>3</sub>) and 1.70 (1 H, br. s, NH);  $\delta_{\text{C}}$  (75 MHz, CDCl<sub>3</sub>) 154.21, 143.54, 142.33, 137.58, 137.21, 136.64, 135.27, 128.47, 128.21, 127.17, 123.99, 116.28, 116.12, 105.66, 72.51, 56.34, 52.05, 50.89 and 25.52; *m/z* (CI) 354 (M<sup>+</sup>+1, 100%).

#### ***N*-[3-(2,6-Dimethoxyphenoxyethyl)-2-(propen-2-yl)phenylmethyl]-*N*-prop-2-enyl 2-nitrobenzene sulfonamide 4**

2-Nitrobenzene sulfonyl chloride (1.19 g, 5.38 mmol) was added to the amine **14** (1.58 g, 4.49 mmol), triethylamine (0.94 cm<sup>3</sup>, 6.73 mmol) and 4-dimethylaminopyridine (11 mg) in dichloromethane (56 cm<sup>3</sup>) and the reaction stirred at room temperature for 16 h. Water (50 cm<sup>3</sup>) was added and the aqueous phase extracted with ether (3 x 50 cm<sup>3</sup>). The organic extracts were washed with brine, dried (MgSO<sub>4</sub>) and concentrated under reduced pressure. Chromatography of the residue using ether : light petroleum (1 : 1) as eluent gave the *title compound 4* (2.21 g, 92%) as a pale yellow oil (Found: M<sup>+</sup>+Na, 561.1666. C<sub>28</sub>H<sub>30</sub>N<sub>2</sub>O<sub>7</sub>SNa requires M, 561.1666);  $\nu_{\max}$  3078, 1642, 1596, 1545, 1493, 1478, 1438, 1372, 1354, 1296, 1254, 1164, 1112, 906, 774 and 735 cm<sup>-1</sup>;  $\delta_{\text{H}}$  (300 MHz, CDCl<sub>3</sub>) 8.05 (1 H, dt, *J* 7, 1.5, ArH), 7.75 – 7.64 (4 H, m, ArH), 7.32 - 7.24 (2 H, m, ArH), 7.04 (1 H, t, *J* 8.5, ArH), 6.61 (2 H, d, *J* 8.5, ArH), 5.62 (1 H, ddt, *J* 17, 10.5, 6.5, 2-H), 5.31 (1 H, m, 1''-H), 5.12 (2 H, m, 3-H<sub>2</sub>), 5.04 and 4.89 (each 1 H, d, *J* 11, ArHCH), 4.82 (1 H, m, 1''-H'), 4.64 (2 H, s, ArCH<sub>2</sub>), 3.97 (2 H, d, *J* 6, 1-H<sub>2</sub>), 3.85 (6 H, s, 2 x OCH<sub>3</sub>) and 2.05 (3 H, t, *J* 1.5, 2''-CH<sub>3</sub>);  $\delta_{\text{C}}$  (75 MHz, CDCl<sub>3</sub>) 154.13, 148.09, 142.33, 142.15, 137.37, 135.53, 134.36, 133.74, 132.37, 132.05, 131.85, 131.36, 128.82, 127.46, 126.75, 124.43, 124.10, 119.60, 117.03, 105.55, 72.24, 56.30, 49.80, 48.23 and 25.07; *m/z* (ES) 561 (M<sup>+</sup>+23, 100%).

## References and notes

1. B. Bradshaw, P. Evans, J. Fletcher, A. T. L. Lee, P. G. Mwashimba, D. Oehlich, E. J. Thomas, R. H. Davies, P. C. P. Allen, K. J. Broadley, A. Hamrouni and C. Escargueil, *Org. Biomol. Chem.*, preceding paper in this issue.
2. P. Abrams, K.E. Anderson, J. J. Buccafusco, C. Chapple, W. Chet de Groat, A. D. Fryer, G. Kay, A. Laties, N. M. Nathanson, P. J. Pasricka and A. J. Wein, *Brit. J. Pharmacology*, 2006, **148**, 565.
3. K. J. Broadley, A. Hamrouni, C. Escargueil, B. C. P. Allen and R. H. Davies, unpublished observations.
4. K. Palczewski, T. Kumaska, T. Hori, C. A. Behnke, H. Motoshima, B. A. Fax, I. Le Trong, D. C. Keller, T. Okada, R. E. Stenkamp, M. Yamamoto and M. Miyano, *Science*, 2000, **289**, 739.
5. A. Dieters and S. F. Martin, *Chem. Rev.*, 2004, **104**, 2199; (b) K. C. Nicolaou, S. G. Bulger and D. Sarlah, *Angew. Chem. Inter. Edn.*, 2005, **44**, 4490.
6. J.-L. Panayides, R. Pathak, C. B. de Koning and W. A. L. van Otterlo, *Eur. J. Org. Chem.*, 2007, 4953.
7. N. Toda, K. Tago, S. Marumoto, K. Takami, M. Ori, N. Yamada, K. Koyama, S. Naruto, K. Abe, R. Yamazaki, T. Hara, A. Aoyagi, Y. Abe, T. Kaneko and H. Kogen, *Bio. Med. Chem.*, 2003, **11**, 4389.

8. T. Kan, H. Kobayashi and T. Fukuyama, *Synlett*, 2002, 697.
9. C. Bibal, S. Mazieres, H. Gornitzka and C. Couret, *Polyhedron*, 2002, **21**, 2827.
10. (a) T. Fukuyama, C.-K. Jow and M. Cheung. *Tetrahedron Lett.*, 1995, **36**, 6373; (b) T. Kan and T. Fukuyama, *Chem. Commun.*, 2004, 353.
11. (a) M. Scholl, S. Ding, C. W. Lee and R. H. Grubbs, *Org. Lett.*, 1999, **1**, 953; (b) S. Brass, H.D. Gerber, S. Dorr and W. E. Diderich, *Tetrahedron*, 2006, **62**, 1777; (c) M. Berberis, P. Garcia-Losada, S. Pleite, J. R. Rodriguez, J. F. Soriano and J. Mendiola, *Tetrahedron Lett.*, 2005, **46**, 4847.
12. K. Sonogashira, Y. Tohda and N. Hagihara, *Tetrahedron Lett.*, 1975, **16**, 4467.
13. E. Negishi, A. O. King, W. L. Klima, W. Patterson and A. Silveira, Jr., *J. Org. Chem.*, 1980, **45**, 2526.
14. F. Caussanel, K. Wang, S. A. Ramachandran and P. Deslongchamps. *J. Org. Chem.*, 2006, **71**, 7370.
15. V. VanRheenen, D. Y. Cha and W. M. Hartley, *Org. Synth.*, 1978, **58**, 43.
16. H. C. Brown and P. Heim, *J. Org. Chem.*, 1973, **38**, 912.
